# Supplementary material for: Unraveling the processes shaping mammalian gut microbiomes over evolutionary time
Source: PubMed Central journal article supplement (PMC5331214; doi:10.1038/ncomms14319), 2017-02-23
Supplement: ncomms14319-s2.pdf [file ncomms14319-s2.pdf]

**Editorial Note:** This manuscript has been previously reviewed at another journal that is not operating a transparent peer review scheme. This document only contains reviewer comments and rebuttal letters for versions considered at *Nature Communications*.

### **Reviewers' comments:**

#### **Reviewer #3 (Remarks to the Author):**

This is an interesting manuscript on a challenging topic that unfortunately still needs substantial improvement. I do have a couple of new ideas for how to achieve this – see major points 1 and 2.

##### Major point 1

I think to make a fair comparison between “diet” and “phylogeny” the authors need to create random variables that change on the host phylogeny at the same rate as diet does. Then the predictiveness of these random variables can be compared directly with that of diet. Apples would be being compared with apples.

Phylogenetic distance is bound to be more predictive at the tips of the tree and less predictive at the top than either diet OR any of these random variables, simply due to it being extremely fine grained metric. The only part of figure 1 that I find meaningful is the comparison between bacteria associated with herbivory and carnivory.

##### Major point 2

It is not obvious to me how much the first half and the second half of the manuscript really have to do with each other. Quite possibly, it would be better split into two with supplementary text integrated into the main text. Two clear focussed manuscripts would be much better than what we have currently, which is a marathon for the reader. I think currently it is simply too ambitious in trying to build a synthesis and falls down in lots of different ways but most especially in terms of presentation. Statistical tests to compare effects of diet and vertical inheritance are welcome and indeed could fit into either manuscript but most of those currently presented are not very convincing...

The two manuscripts would be:

- (1) How strong is the polysymbiosis signal in mammals?
- (2) Effect of diet on mammalian microbiota.

I suppose the bottom line is I just do not accept the "disentangled".

##### Major point 3

I still find this manuscript difficult to understand, due to language which is abstract and imprecise. For example, there are about 101 ways the sentences below from the abstract

can be interpreted. I think I know approximately the correct ones but this is based on having read and thought about the manuscript and even then the residual uncertainties make the substance of the overall claims hard to evaluate:

Here, we show that host phylogeny and diet, despite being deeply confounded, select non-overlapping gut bacterial lineages, and do so on vastly different timescales.

Host diet is something entirely concrete, what the host eats. Host phylogeny means the position on the phylogeny of the hosts relative to the others. I take it that deeply confounded means simply that differences in diet evolve slowly and therefore do not change many times in the phylogeny.

Non overlapping is a very strong claim. To say that no-diet selected lineages also show any correlation with phylogeny is very strong, if this is the claim being made. I think what is meant is that the lineages that show the strongest (or detectable, given the dataset you have) signals of phylogenetic correlation are different from the ones that show the strongest (or detectable, given the dataset you have) dietary correlation. But either of these weak versions of the claim would be unsurprising. The strong claim is implausible. Given a large enough dataset, it seems likely that essentially any bacteria would show some phylogenetic correlation and the vast majority would also show some dietary correlation as well.

"different timescales" is not referring to the speed of evolution, nor the selection coefficient but in fact bacterial phylogenetic distance. I only know that because I read the manuscript. Throughout it is not clear enough whether time really means time or whether it is bacterial distances/times or host distances/times that are being referred to.

However, associations with host phylogeny are mostly seen among more recent lineages, driven by a process operating at the same time scale as host evolution.

Associations of what, exactly? I think you mean bacterial phylogeny but exactly what is not clear. I may be missing something but it seems to me that associations of anything with host phylogeny have to be at least in some senses driven on the same time scale as host evolution. And I believe that "more recent lineages" are groups of related bacteria that diverged recently but only because I read the manuscript.

More detailed phylogenetic analyses support co-speciation as playing a significant role in the evolution of mammalian gut symbionts.

In what sense more detailed? And more detailed than what, exactly. Also, I think all that you mean is there is a signal of cospeciation, not that cospeciation itself has had evolutionary consequences. This would be very interesting of course but it is a potential implication of your current findings, rather than a finding.

Diet mostly influences the acquisition of deeply divergent microbial lineages. This sentence does not actually make sense, literally it implies that diet causes the

acquisition of bacteria that are dissimilar from each other. Diet influences some bacteria more than others. What I think you mean is that groups of bacteria that are strongly predicted by particular diets form large (and therefore old) clumps on the tree of life.

The introduction is rather clearer than the abstract in terms of language. However by the below:

We hypothesized that these two factors may have driven vertical and horizontal inheritance of bacterial lineages at different phylogenetic scales.

It's unclear whether you mean host phylogenetic scales or bacterial phylogenetic scales. I think it is probably host. Host switches happen on a phylogeny. They do not happen at "phylogenetic scales", they happen at specific places on the host tree. It's far too unclear what you actually mean.

And by the below

However, if vertical inheritance is not involved, associations with host phylogeny should be seen at timescales of bacterial evolution that are decoupled from host evolution.

I think this is what you actually mean is:

However, if vertical inheritance is not involved, associations with host diet would be seen at a variety of timescales of bacterial evolution, reflecting the rate of adaptation of bacteria to specific diets. Correlations between bacteria and host will be driven by the correlation of host diet with host phylogeny but the bacterial lineages involved can be either much younger or much older than the set of related hosts that share the same diet.

i.e. If vertical inheritance does not matter, then host phylogeny will only predict bacteria insofar as it predicts diet.

Note (somewhat tangentially) that if a particular diet only evolved once, then the bacterial lineages that evolved to take advantage of that diet might well be the same age as the diet itself. So in that case, they may not be uncoupled temporally.

while the correlation with diet would be primarily driven by horizontal inheritance, if diet changes slowly, this is not necessarily clear.

And then at the end in the final sentence of the introduction, you seem to in some way equate host phylogeny with vertical and diet with horizontal, which seems terribly unhelpful.

may allow us to disentangle the individual contributions of host phylogeny and diet, and to understand how and to what extent these vertical and horizontal inheritances have driven gut community evolution.

I continue to think it is false to say that the effects of diet and phylogeny are being disentangled. The point is that things that are correlated with diet are still vertically inherited through large parts of the phylogeny. Finding different patterns to statistical

correlations is different from disentangling, which would entail e.g. explicitly detecting bacterial switches due to dietary switches.

I do not see at all what it proves that the lineages that are not associated with diet have correlations with host phylogeny that are nearly as strong as all of them. Is there a way of directly comparing diet and non-diet associated lineages of a similar age? In any case, the claims about "non-overlapping" seem to come out of thin air and indeed seem to be contradicted by this sentence:

some bacteria related to host phylogeny at recent time scales are nested within higher clades also related to host diet,

Figure 1D, not clear enough at least based on main text/figure legend what was done and what is being shown.

The reasoning that there are no omnivory associated taxa is not clear enough in the main text/figure.

The main text of the latter part of the results should be integrated with the supplementary text, as it is it is extremely hard to get anything out of it as to what is actually going on.

#### **Reviewer #4 (Remarks to the Author):**

This is an interesting paper by Groussin and colleagues, investigating the gut microbiome of 33 mammal species using a new methodology. I identified several issues:

1. According to today's standards, the 16S sequencing dataset used here (from Muegge et al.) is low quality. There is a small number of reads (seems like around 44,000 total from 33 samples). In principle, as a reviewer, I am not in favor of asking authors to collect and generate more data. Nevertheless, these issues greatly reduce my confidence in the validity of the results, and I would recommend that the authors address this issue explicitly in the text, as well as include analyses that show that the below-standard dataset is not influencing the result. Maybe some sort of a subsampling analysis, simulations, or other (newer) publicly available datasets used as a point of comparison, to show the results using this small dataset are unbiased?

2. Another problematic issue is that only a single individual is sampled from each species. Thus, this analysis cannot account for within-species variation, which could have a large effect, as we know from human studies. As above, I would encourage the authors to address this and alleviate these concerns. Maybe using other available datasets that contain multiple individuals from each species to show the selection of a single individual from each species doesn't bias the result?

3. I might have missed it, but I could not find a link to view or download the data used here. These should be made freely available to reviewers and readers who may be interested in replicating the study or re-analyzing the data for new biological findings. Ideally, there should be a link to download all the processed datasets used in the analysis.

1 **Reviewers' comments:**

2  
3 **Reviewer #3 (Remarks to the Author):**

4  
5  
6 **This is an interesting manuscript on a challenging topic that unfortunately still**  
7 **needs substantial improvement. I do have a couple of new ideas for how to achieve**  
8 **this – see major points 1 and 2.**

9  
10  
11 **Major point 1**

12  
13 **I think to make a fair comparison between “diet” and “phylogeny” the authors need**  
14 **to create random variables that change on the host phylogeny at the same rate as**  
15 **diet does. Then the predictiveness of these random variables can be compared**  
16 **directly with that of diet. Apples would be being compared with apples.**

17  
18 This is a good suggestion for a control that we did not think of in the previous draft. We  
19 have performed simulation experiments as suggested by the reviewer. We have estimated  
20 the transition rates between dietary states (herbivory, carnivory and omnivory) with the  
21 ARD (All Rates Different) Markovian model (implemented in the ape R package) along  
22 the phylogeny of 1,534 mammals that we have used elsewhere in the paper (note that the  
23 ARD model was selected because it is the model that best fits the data among all models  
24 that we have tested). We used the ML estimates of these transition rates to simulate traits  
25 along our phylogeny of 33 mammals (100 replicates), so that each trait is forced to evolve  
26 at the same rate as diet does along the host phylogeny. Then we computed trait distance  
27 matrices and performed a BDTT analysis to compare the explanatory power ( $R^2$ ) of these  
28 simulated traits to the one of the observed diet. Supp. Fig. 8 (below) shows that the  
29 simulated traits poorly predict the compositional dissimilarities of our mammalian gut  
30 microbiomes. Importantly, **we do not observe any increase in explanatory power**  
31 **when computing correlations at ancient time scales**, ruling out the possibility that the  
32 peak of correlation with observed diet at ancient time scales is only driven by the coarse  
33 granularity of the dietary distance matrix. It also further supports the claim that there is an  
34 effect of diet that is independent from the host phylogeny.

35

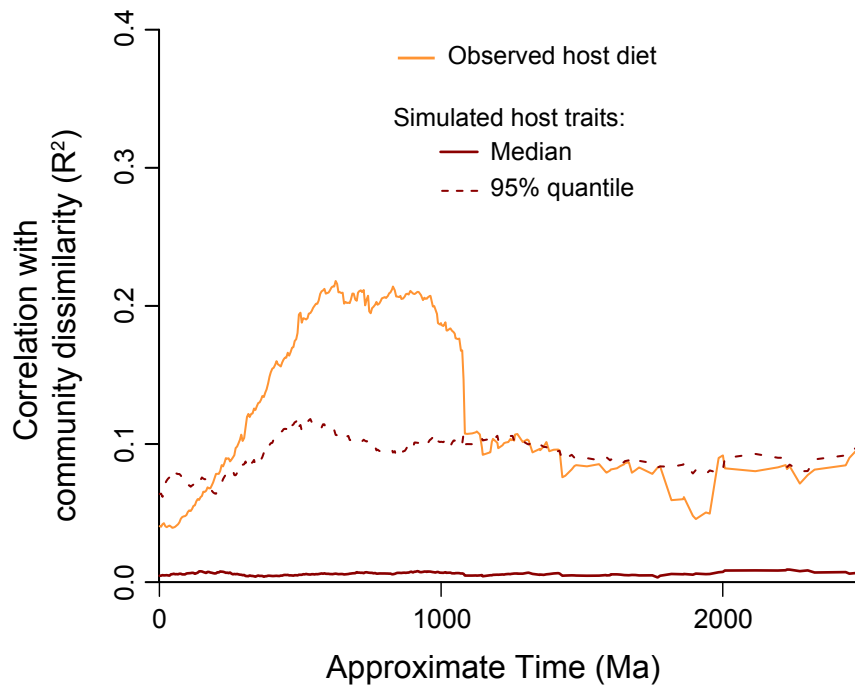

36  
37  
38  
39  
40  
41  
42  
43  
44  
45  
46  
47  
48  
49  
50  
51  
52  
53  
54  
55  
56  
57 Supp. Fig. 8: The peak in correlation between diet and gut microbiome compositions at  
58 ancient timescales is not simply an echo of phylogenetic history written in diet.

59 We simulated phylogenetically-conserved traits that evolved along the mammalian  
60 phylogeny at the same rate as diet does, and compared the correlation profiles between  
61 these simulated traits and microbiome compositions with the correlation profile obtained  
62 with observed diets. The distributions of simulated correlation profiles are represented in  
63 the form of a 95% null envelope. The dark red plain line connects the medians of these  
64 distributions. The dark red dashed line connects the 95% quantiles. The original  
65 correlation profile with observed diets is in orange and is the same as in Fig. 1A. The  
66 high correlation with observed diets at ancient timescales is significantly higher than the  
67 null, showing that there is a genuine signal associated with diet that is independent from  
68 the host phylogenetic history written in diet.

69  
70  
71  
72 **Phylogenetic distance is bound to be more predictive at the tips of the tree and less**  
73 **predictive at the top than either diet OR any of these random variables, simply due**  
74 **to it being extremely fine grained metric. The only part of figure 1 that I find**  
75 **meaningful is the comparison between bacteria associated with herbivory and**  
76 **carnivory.**

77  
78 Thank you for this comment. The hypothesis formulated by the reviewer is that the fine  
79 granularity of the host phylogenetic distance matrix (compared to the coarse granularity  
80 of the diet distance matrix) is biasing the sections of the bacterial tree where the  
81 predictive power for microbiome compositions is high towards the tips of the tree. If this

82 is true, using coarse-grained host phylogenetic distance matrices should displace the area  
83 where the correlation with host phylogeny is maximum towards more ancient regions of  
84 the bacterial tree, just as we observe for diet. We have tested for this possible bias as  
85 follows. We re-ran BDTT using a series of coarse-grained distance matrices for host  
86 phylogeny. We reasoned that if the fine-grained distances were leading to the peak at  
87 more recent times, then using more coarse-grained distances for the host would lead to a  
88 correlation at older distances. To test this hypothesis, we used a set of thresholds to  
89 define new, more coarse-grained host phylogenetic distances matrices, with all pairwise  
90 distances below these thresholds set to null. Supp. Fig. 7 (below) shows that when  
91 coarse-grained host phylogenetic distance matrices are used, the correlation with host  
92 phylogeny is always localized at recent time scales on the bacterial phylogeny, separated  
93 from the highest correlations with host diet along the phylogeny of bacteria. In fact, when  
94 the most coarse-grained host distance matrix is used, the signal disappears entirely, and  
95 never shifts toward more ancient times. This control experiment, along with our new  
96 simulation experiment detailed above, further confirms that host phylogeny and diet  
97 impact gut microbiome compositions at different bacterial phylogenetic scales, and that  
98 these effects can be partitioned with our BDTT approach, which is illustrated in Figure 1.

99  
100  
101  
102  
103  
104  
105  
106  
107  
108  
109  
110  
111  
112  
113  
114  
115  
116  
117  
118  
119  
120  
121  
122  
123  
124  
125  
126  
127



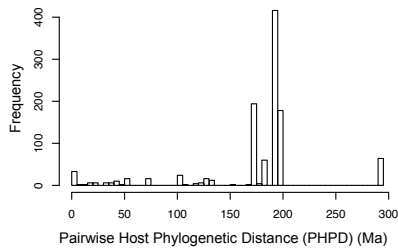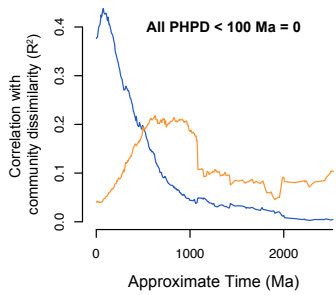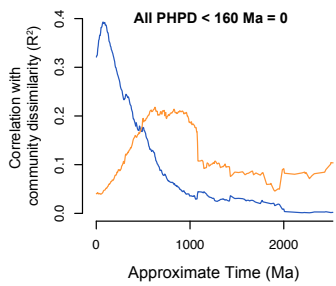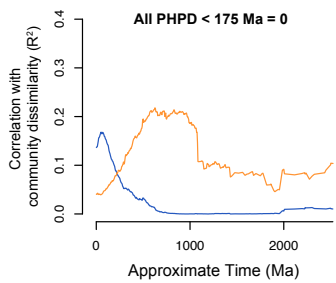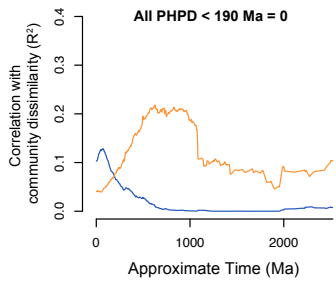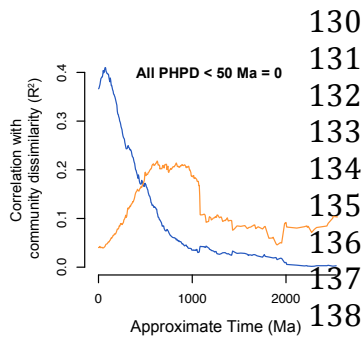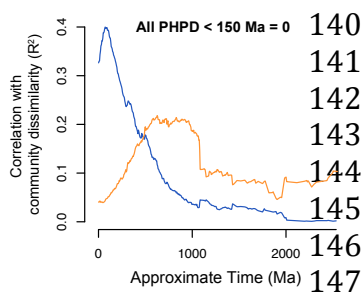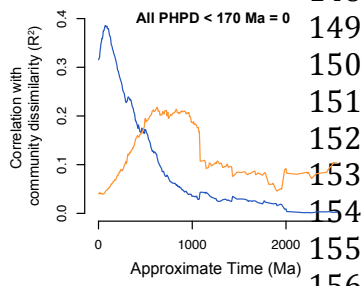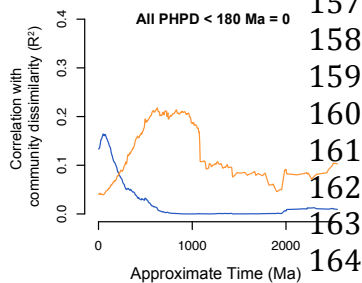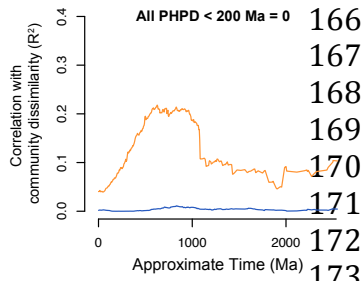

130  
131  
132  
133  
134  
135  
136  
137  
138  
139  
140  
141  
142  
143  
144  
145  
146  
147  
148  
149  
150  
151  
152  
153  
154  
155  
156  
157  
158  
159  
160  
161  
162  
163  
164  
165  
166  
167  
168  
169  
170  
171  
172  
173

Supp. Fig. 7: The high correlation with host phylogeny in recent regions of the bacterial tree does not depend on the high-granularity of the matrix of host phylogenetic distances. The top left panel shows the distribution of all pairwise host distances in time units between our 33 mammals. The other panels are replicates of Fig. 1A, using different granularities for the matrix of host phylogenetic distances, from fine-grained (top right panel) to coarse-grained (bottom panels) matrices. PHPD: Pairwise Host Phylogenetic Distance. For a given plot, all PHPDs below a given distance threshold are set to 0, decreasing the granularity of the original distance matrix. When the granularity of the host phylogenetic distance matrix is getting coarse, the correlation with gut microbiome compositions is decreasing, as expected. However, the maximum of this correlation is not shifting towards more ancient regions of the bacterial tree, and the scale disparity between the effects of host phylogeny and diet is still observed.

174  
175  
176  
177  
178  
179  
180  
181  
182  
183  
184  
185  
186  
187  
188  
189  
190  
191  
192  
193  
194  
195  
196  
197  
198  
199  
200  
201  
202  
203  
204  
205  
206  
207  
208  
209  
210  
211  
212  
213  
214  
215  
216  
217

**Major point 2**

**It is not obvious to me how much the first half and the second half of the manuscript really have to do with each other. Quite possibly, it would be better split into two with supplementary text integrated into the main text. Two clear focussed manuscripts would be much better than what we have currently, which is a marathon for the reader. I think currently it is simply too ambitious in trying to build a synthesis and falls down in lots of different ways but most especially in terms of presentation. Statistical tests to compare effects of diet and vertical inheritance are welcome and indeed could fit into either manuscript but most of those currently presented are not very convincing...**

**The two manuscripts would be:**

- (1) How strong is the polysymbiosis signal in mammals?**
- (2) Effect of diet on mammalian microbiota.**

We thank the reviewer for this suggestion. We agree that that there is a lot of material in this manuscript. At the same time, there is some advantage to presenting them together in a single paper to show how the different processes involved in shaping gut microbiome compositions can be modeled and quantified in future evolutionary analyses of host-associated microbiome data. The first half of our manuscript also provides necessary context for the analyses presented in the second half. Given the arguments to be made for and against splitting the manuscript, we will seek guidance from the editor on the most appropriate way to present the work at *Nature Communications*.

**I suppose the bottom line is I just do not accept the "disentangled".**

Regarding the disentangling of host phylogeny and diet: we agree that it is a very difficult task, and our approach is certainly not perfect. Indeed, for traits evolved on the same phylogeny, it simply may not be possible to completely disentangle their effects. However, we think that the collection of all of these experiments and results represent a significant improvement from what has been presented in the literature in the past.

That said, we have added a sentence in the manuscript to explicitly state that we are only partitioning the main effects of host phylogeny and diet, and that it might not be possible to entirely disentangle the factors themselves ("Note that BDTT allows us to statistically disentangle the temporally separated portions of the contributions of host phylogeny and diet (when defined with a coarse granularity), not the totality of the processes themselves.", Lines 133-136). We again explicitly discuss these issues later in the text when presenting the results on co-speciation (lines 321-328).

218 In addition, we have changed the title, removing the reference to disentangling diet and  
219 phylogeny. The new title is: “Unraveling the processes shaping mammalian gut  
220 microbiomes over evolutionary time”

221

222 In addition, we now clearly state in the text that the effects of diet that we can capture are  
223 only those that are subsequent of major dietary shifts, which are uncorrelated to host  
224 phylogeny at the scale of all mammals. Furthermore, our study gives researchers a more  
225 concrete way to assay whether (host-)phylogenetically-correlated signals in microbiome  
226 data are likely to be driven by contemporaneous coevolution — a question about which  
227 there is frequently some confusion. Finally, while host phylogeny and host diet are often  
228 considered as ‘competing’ explanatory factors in the literature (Carmody et al., 2015 Cell  
229 Host & Microbe), we show that they actually act at different (bacterial phylogenetic)  
230 scales.

231

232 Of course, we are aware that the evolutionary trajectory of some bacteria might be driven  
233 by dietary differences that are themselves correlated to host phylogeny, and that it is  
234 difficult for us to disentangle the effects of host phylogeny and diet in these cases.  
235 However, there has been little attempt to partition their main effects at this phylogenetic  
236 scale in mammals, which has made it difficult for the research community to develop an  
237 intuition for the individual effect of both factors. Within the bounds of what we can  
238 actually achieve with these kinds of data, we think that our manuscript provides an  
239 interesting dissection of the main effects of host phylogeny and diet.

240

241

242 **Major point 3**

243

244 **I still find this manuscript difficult to understand, due to language which is abstract**  
245 **and imprecise. For example, there are about 101 ways the sentences below from the**  
246 **abstract can be interpreted. I think I know approximately the correct ones but this**  
247 **is based on having read and thought about the manuscript and even then the**  
248 **residual uncertainties make the substance of the overall claims hard to evaluate:**

249

250 **Here, we show that host phylogeny and diet, despite being deeply**  
251 **confounded, select non-overlapping gut bacterial lineages, and do so on vastly**  
252 **different timescales.**

253

254 **Host diet is something entirely concrete, what the host eats. Host phylogeny means**  
255 **the position on the phylogeny of the hosts relative to the others. I take it that deeply**  
256 **confounded means simply that differences in diet evolve slowly and therefore do not**  
257 **change many times in the phylogeny.**

258

259 We have attempted to make changes in the abstract to clarify all these points that are  
260 mentioned given word limits (see below). In particular, we have removed the term “non-  
261 overlapping” from the text, and rephrased the abstract and the paragraph in the main text  
262 presenting these results (lines 137-154).

263

264 **Non overlapping is a very strong claim. To say that no-diet selected lineages also**  
265 **show any correlation with phylogeny is very strong, if this is the claim being made. I**  
266 **think what is meant is that the lineages that show the strongest (or detectable, given**  
267 **the dataset you have) signals of phylogenetic correlation are different from the ones**  
268 **that show the strongest (or detectable, given the dataset you have) dietary**  
269 **correlation. But either of these weak versions of the claim would be unsurprising.**  
270 **The strong claim is implausible. Given a large enough dataset, it seems likely that**  
271 **essentially any bacteria would show some phylogenetic correlation and the vast**  
272 **majority would also show some dietary correlation as well.**

273  
274 Concerning the “non-overlapping” claim — as said above, we have removed this term  
275 from the paper. We agree that this claim depends on the data that we have. That said,  
276 these data are representative of the part of the microbiome containing the most abundant  
277 bacterial taxa in each of these mammals. Among these bacterial lineages, we clearly  
278 observe that some bacterial lineages that show correlation with host phylogeny do not  
279 exhibit distributions across hosts that correlate with diet, and vice versa. For instance,  
280 *Bacteroides fragilis* has developed host-specific interaction mechanisms with the host  
281 epithelium cells, allowing it to colonize the gut of all mammals, irrespective of diet (e.g.  
282 Lee et al., Nature, 2013). Members of the fiber-degrading Prevotellaceae family are  
283 frequently observed in our plant-eating mammals, irrespective of their phylogenetic  
284 distances. Finally, Moeller et al. (Science, 2016) have shown that even at the short time  
285 scale of Hominid evolution, spore-former Lachnospiraceae bacteria do not harbor co-  
286 speciation patterns with host phylogeny, highlighting the fact that some bacteria can  
287 colonize hosts without any specificity regarding their phylogenetic distances.

288  
289 **“different timescales” is not referring to the speed of evolution, nor the selection**  
290 **coefficient but in fact bacterial phylogenetic distance. I only know that because I**  
291 **read the manuscript. Throughout it is not clear enough whether time really means**  
292 **time or whether it is bacterial distances/times or host distances/times that are being**  
293 **referred to.**

294  
295 Thank you for this comment. We have modified the abstract, which now states “[...] and  
296 do so on vastly different *bacterial evolutionary* timescales”

297  
298 **However, associations with host phylogeny are mostly seen among more recent**  
299 **lineages, driven by a process operating at the same time scale as host evolution.**

300  
301 **Associations of what, exactly? I think you mean bacterial phylogeny but exactly**  
302 **what is not clear. I may be missing something but it seems to me that associations of**  
303 **anything with host phylogeny have to be at least in some senses driven on the same**  
304 **time scale as host evolution. And I believe that “more recent lineages” are groups of**  
305 **related bacteria that diverged recently but only because I read the manuscript.**

306  
307 We have rephrased this section. We now state:  
308

309 “Conversely, correlation with host phylogeny is mostly seen among more recently-  
310 diverged bacterial lineages”

311

312 **More detailed phylogenetic analyses support co-speciation as playing a significant**  
313 **role in the evolution of mammalian gut symbionts.**

314

315 **In what sense more detailed? And more detailed than what, exactly. Also, I think all**  
316 **that you mean is there is a signal of cospeciation, not that cospeciation itself has had**  
317 **evolutionary consequences. This would be very interesting of course but it is a**  
318 **potential implication of your current findings, rather than a finding.**

319

320 Thank you for this comment. We have modified this statement to be more accurate:

321

322 “Phylogenetic analyses support co-speciation as playing a significant role in the evolution  
323 of mammalian gut microbiome compositions.”

324

325 **Diet mostly influences the acquisition of deeply divergent microbial lineages.**  
326 **This sentence does not actually make sense, literally it implies that diet causes the**  
327 **acquisition of bacteria that are dissimilar from each other. Diet influences some**  
328 **bacteria more than others. What I think you mean is that groups of bacteria that**  
329 **are strongly predicted by particular diets form large (and therefore old) clumps on**  
330 **the tree of life.**

331

332 You are right, this is what we mean. We now state:

333

334 “Diet mostly influences the acquisition of ancient microbial lineages.”

335

336 **The introduction is rather clearer than the abstract in terms of language. However**  
337 **by the below:**

338

339 **We hypothesized that these two factors may have driven vertical and horizontal**  
340 **inheritance of bacterial lineages at different phylogenetic scales.**

341

342 **Its unclear whether you mean host phylogenetic scales or bacterial phylogenetic**  
343 **scales. I think it is probably host. Host switches happen on a phylogeny. They do not**  
344 **happen at “phylogenetic scales”, they happen at specific places on the host tree. Its**  
345 **far to unclear what you actually mean.**

346

347 We are sorry for this confusion. We actually meant “bacterial” phylogenetic scales. We  
348 have added this detail (Line 44).

349

350 **And by the below**

351 **However, if vertical inheritance is not involved, associations with host phylogeny**  
352 **should be seen at timescales of bacterial evolution that are decoupled from host**  
353 **evolution.**

354  
355  
356  
357  
358  
359  
360  
361  
362  
363  
364  
365  
366  
367  
368  
369  
370  
371  
372  
373  
374  
375  
376  
377  
378  
379  
380  
381  
382  
383  
384  
385  
386  
387  
388  
389  
390  
391  
392  
393  
394  
395  
396  
397  
398  
399

**I think this is what you actually mean is:**

**However, if vertical inheritance is not involved, associations with host diet would be seen at a variety of timescales of bacterial evolution, reflecting the rate of adaptation of bacteria to specific diets. Correlations between bacteria and host will be driven by the correlation of host diet with host phylogeny but the bacterial lineages involved can be either much younger or much older than the set of related hosts that share the same diet.**

**i.e. If vertical inheritance does not matter, then host phylogeny will only predict bacteria insofar as it predicts diet.**

**Note (somewhat tangentially) that if a particular diet only evolved once, then the bacterial lineages that evolved to take advantage of that diet might well be the same age as the diet itself. So in that case, they may not be uncoupled temporally.**

As explained above, there is a clear effect of the ancient major dietary shifts that is independent of the effect of host phylogeny. Host phylogeny can actually encompass multiple factors that are perfectly correlated to host phylogenetic distances, such as genetic, physiological or historical factors, which can all impact gut microbiome compositions irrespective of the influence of diet (most notably genes involved in dialogues between bacteria and the immune system). These host phylogeny-related traits can select for bacterial lineages that are either older, younger or contemporary with the set of hosts that share these traits.

The sentence quoted above (“However, if vertical inheritance is not involved [...] decoupled from host evolution”) actually only concerns these traits that shape microbiome composition independently from diet. We have rephrased the whole section to provide more explanations and background to the reader (lines 43-57).

**while the correlation with diet would be primarily driven by horizontal inheritance,**

**If diet changes slowly, this is not necessarily clear.**

Absolutely, you are correct. Fine-scale differences in diet might be correlated with host phylogeny, leaving patterns that are not distinguishable from the effect of host phylogeny (as explained above, we discuss these notions in lines 321-328 and Supplementary Discussion section 2.10). However, our paper is only focusing on the effect of large differences in diet on the composition of microbiomes (as explained in lines 35-40). And these large shifts occurred frequently in the history of mammals (see Price et al, 2010, PNAS). At the scale of our 33 mammals, we observe that when defining diet using large categories (herbivory, omnivory, carnivory), 23% of mammalian lineages experienced switches of diet (15 out of 64 branches). As shown in Supp. Fig. 11, these shifts are congruent with horizontal (and parallel) acquisitions of diet-related bacterial lineages.

**And then at the end in the final sentence of the introduction, you seem to in some**

400 way equate host phylogeny with vertical and diet with horizontal, which seems  
401 terribly unhelpful.  
402 may allow us to disentangle the individual contributions of host phylogeny and diet,  
403 and to understand how and to what extent these vertical and horizontal inheritances  
404 have driven gut community evolution.  
405

406 Thank you for this comment. We agree with this point. We have rephrased this section to  
407 be clearer about our hypotheses (lines 58-62). We now state that major dietary shifts were  
408 associated with horizontal inheritance of diet-specific bacteria. Host phylogeny, however,  
409 can be associated with both horizontal and vertical inheritance, as explained in Supp. Fig.  
410 1. Our paper provides evidence of these horizontal acquisitions when shifting between  
411 main dietary categories (Supp. Fig. 11) and provides a quantitative measurement of the  
412 part of the correlation signal with host phylogeny that is congruent with vertical  
413 inheritance of bacterial lineages (Figure 4).

414  
415 **I continue to think it is false to say that the effects of diet and phylogeny are being**  
416 **disentangled. The point is that things that are correlated with diet are still vertically**  
417 **inherited through large parts of the phylogeny. Finding different patterns to**  
418 **statistical correlations is different from disentangling, which would entail e.g.**  
419 **explicitly detecting bacterial switches due to dietary switches.**

420  
421 **I do not see at all what it proves that the lineages that are not associated with diet**  
422 **have correlations with host phylogeny that are nearly as strong as all of them. Is**  
423 **there a way of directly comparing diet and non-diet associated lineages of a similar**  
424 **age? In any case, the claims about “non-overlapping” seem to come out of thin air**  
425 **and indeed seem to be contradicted by this sentence:**

426  
427 **some bacteria related to host phylogeny at recent time scales are nested within**  
428 **higher clades also related to host diet,**

429  
430 Within the bounds of what we can do with these data, we clearly observe that a vast  
431 majority of the bacterial lineages that have a distribution across hosts that is correlated  
432 with host phylogenetic distances are not nested within larger bacterial clades that are  
433 correlated with coarse-grained diet (*i.e.* main dietary categories). Only a small fraction of  
434 those do show nestedness patterns, which we explain with this sentence (“some bacteria  
435 related to host phylogeny at recent time scales are nested within higher clades also related  
436 to host diet”, line 144-147 in the main text). As explained above in this response (lines  
437 206-243 and 278-291), we know that some bacterial lineages are strongly expected to be  
438 linked to host phylogeny independently of diet, and others to be influenced by diet,  
439 independently of host phylogeny. Our results confirm these expectations at the scale of  
440 the microbiome. Finally, when measuring the effects of diet, we define diet with a coarse  
441 granularity and are only focusing on the impact of large dietary differences on the gut  
442 microbiome composition. Our results show that these effects can be reasonably  
443 partitioned from those of factors that are more intimately correlated to host phylogeny,  
444 including, of course, small differences in diet.

445

446 **Figure 1D, not clear enough at least based on main text/figure legend what was done**  
447 **and what is being shown.**

448

449 We thank the reviewer for this. We have added details in the legend to clarify what was  
450 done for Figure 1D.

451

452 **The reasoning that there are no omnivory associated taxa is not clear enough in the**  
453 **main text/figure.**

454

455 Thank you for this comment; we have edited the legend to make it clearer.

456

457 **The main text of the latter part of the results should be integrated with the**  
458 **supplementary text, as it is it is extremely hard to get anything out of it as to what is**  
459 **actually going on.**

460

461 We agree that this latter part is more speculative than the rest of the study, and we  
462 explicitly state that future studies are needed to confirm our last results. But this section is  
463 important because it provides some of the first (albeit merely suggestive) evidence that  
464 some of the bacterial lineages that are putatively co-speciating with mammals and that  
465 are present in humans are functionally linked to human health. We feel that this analysis  
466 provides a compelling and broadly accessible connection between the largely theoretical  
467 arguments earlier in the manuscript, and issues that are likely to be closer to the research  
468 interests of many in the readership of *Nature Communications*. Showing that the more  
469 tightly co-speciating bacterial lineages present in humans are also enriched among the  
470 genera that were found to be negatively associated with IBD coherently extends the  
471 previous section on co-speciation patterns at the scale of all mammals and suggests some  
472 more mechanistic hypotheses for future study.

473

474

475

476

477

478

479



480 **Reviewer #4 (Remarks to the Author):**

481

482 **This is an interesting paper by Groussin and colleagues, investigating the gut**  
483 **microbiome of 33 mammal species using a new methodology. I identified several**  
484 **issues:**

485

486 **1. According to today's standards, the 16S sequencing dataset used here (from**  
487 **Muegge et al.) is low quality. There is a small number of reads (seems like around**  
488 **44,000 total from 33 samples). In principle, as a reviewer, I am not in favor of asking**  
489 **authors to collect and generate more data. Nevertheless, these issues greatly reduce**  
490 **my confidence in the validity of the results, and I would recommend that the**  
491 **authors address this issue explicitly in the text, as well as include analyses that show**  
492 **that the below-standard dataset is not influencing the result. Maybe some sort of a**  
493 **subsampling analysis, simulations, or other (newer) publicly available datasets used**  
494 **as a point of comparison, to show the results using this small dataset are unbiased?**  
495

496

497 We agree with the reviewer that we could increase the sequencing depth of these  
498 samples. However, we do not think that undersampling questions the validity of the  
499 results that we present here. Undersampling would only tend to destroy any underlying  
500 phylogenetic signal, and not create false associations with phylogeny or diet where there  
501 is none. The diversity that we have with these data is representative of the part of the  
502 microbiome containing the most abundant bacterial taxa in each of these mammals. We  
503 expect these most abundant bacteria to be involved in numerous functions related to host  
504 diet or host metabolism/physiology. In addition, as suggested by the reviewer, we have  
505 performed our BDTT analyses, our estimations of gain and loss of lineages and our co-  
506 speciation analyses on rarefied OTU tables, which represent subsamplings of the initial  
507 dataset. In all of these subsampling analyses, we reached strong and significant  
508 conclusions, demonstrating that we have enough statistical power with these data to  
509 discriminate alternative hypotheses.

510

511 In conclusion, although this dataset might not be the most exhaustive sampling of gut  
512 bacteria in mammals, it is sufficient to capture strong, significant and coherent signals  
513 regarding the dynamics of gut microbiome evolution that we observe and report for the  
514 first time.

515

516 **2. Another problematic issue is that only a single individual is sampled from each**  
517 **species. Thus, this analysis cannot account for within-species variation, which could**  
518 **have a large effect, as we know from human studies. As above, I would encourage**  
519 **the authors to address this and alleviate these concerns. Maybe using other available**  
520 **datasets that contain multiple individuals from each species to show the selection of**  
521 **a single individual from each species doesn't bias the result?**

522

523 We thank the reviewer for this comment. However, we do not think that the microbiome  
524 compositional variability between individuals of the same species is a strong concern  
525 regarding our main conclusions. The main reason is that in the case where intra host  
variability would be higher than inter host variability, it would blur or break the signal

526 between host phylogeny or diet and microbiome composition. As we observe strong  
527 associations between these variables at the inter host level, it means that the intra-host  
528 compositional variance inherent to each host species has weak effects compared to inter-  
529 host compositional variance. To support this point even further, we have controlled for  
530 this effect with our data. The initial Muegge dataset included replicate samples for 7  
531 hosts (Baboon, Big Horn, Human, Chimp, Hyrax, Lion and Okapi). We initially selected  
532 only one individual for each of these species to focus on inter-host species comparisons.  
533 We have substituted these 7 individuals with their conspecific and we have re-processed  
534 the data with the exact same parameters. We computed the BDTT profiles characterizing  
535 the correlation between the new microbiome compositional dissimilarities and host  
536 phylogenetic or dietary distances (which remain unchanged). We now present these  
537 results in Supp. Fig. 6 (below) and show that our initial conclusions hold true with this  
538 different host sampling, confirming that intra-host compositional variability does not blur  
539 signals of inter-host compositional differences.  
540

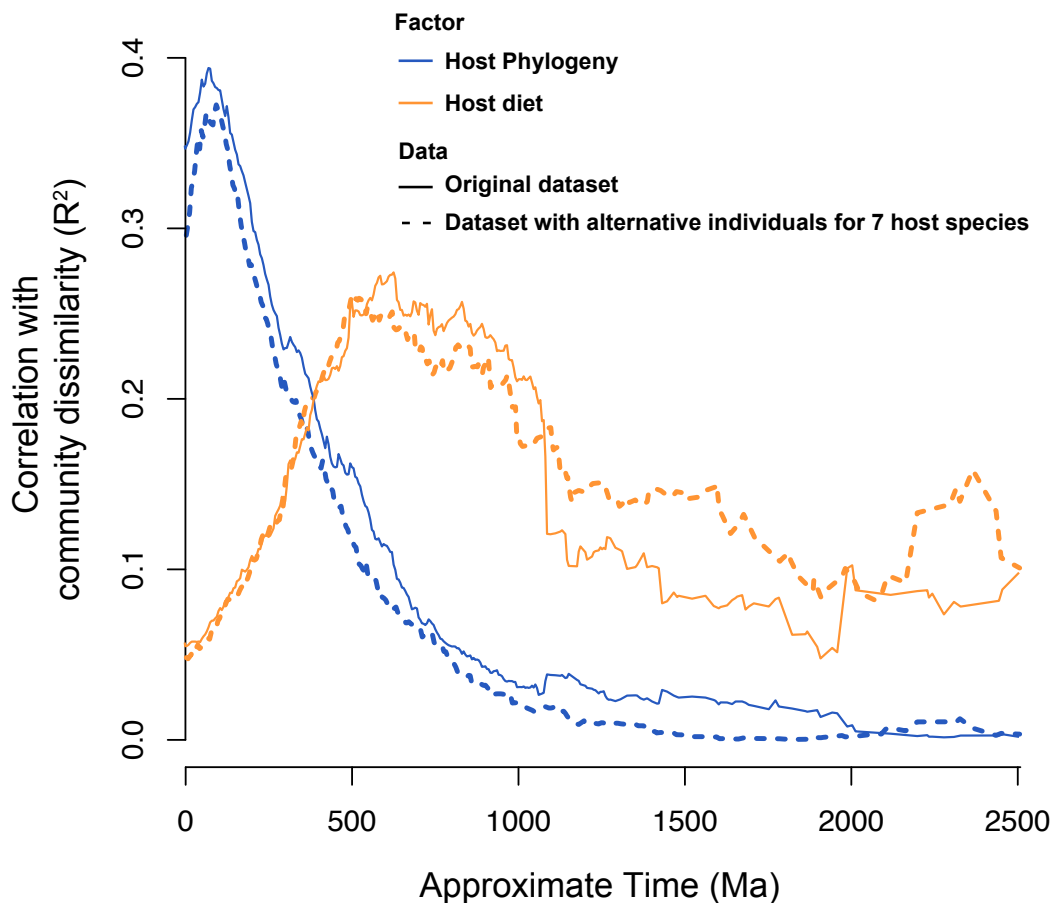

541  
542  
543 Supp. Fig. 6: Control for the impact of intra-host variability on the scale disparity  
544 between the effects of host phylogeny and diet.  
545 The BDTT analyses were run as in Fig. 1A. The plain blue and orange lines show the  
546 original correlation profiles with host phylogeny and diet, respectively (Fig. 1A). The

547 dashed lines show the correlation profiles with both factors that we obtained when using  
548 the gut microbiome of alternative individuals for 7 host species. This control confirms  
549 that the intra-host compositional variability is much weaker than the inter-host  
550 compositional differences and that our main conclusions regarding associations between  
551 microbiomes and host phylogeny and diet drawn in our manuscript are not biased by our  
552 choice of individuals within each host species.

553

554

555

556 **3. I might have missed it, but I could not find a link to view or downloaded the data**  
557 **used here. These should be made freely available to reviewers and readers who may**  
558 **be interested in replicating the study or re-analyzing the data for new biological**  
559 **findings. Ideally, there should be a link to download all the processed datasets used**  
560 **in the analysis.**

561

562 This is a good point. The link to download the original data can be found in Muegge et al.  
563 paper. We have added an additional link to download the multiple sequence alignment of  
564 the processed 16S data that we used for all phylogenetic analyses (lines 442-449).  
565 Furthermore, we have also deposited the OTU table of unique sequences, the calibrated  
566 and non-calibrated bacterial phylogenetic trees, the matrix of host phylogenetic distances  
567 and the matrix of host dietary distances.

**REVIEWERS' COMMENTS:**

**Reviewer #3 (Remarks to the Author):**

Thank you very much for seriously considering all of my comments and acting on most of them.

**Reviewer #4 (Remarks to the Author):**

The authors have adequately addressed my concerns.

**REVIEWERS' COMMENTS:**

**Reviewer #3 (Remarks to the Author):**

**Thank you very much for seriously considering all of my comments and acting on most of them.**

We thank the reviewer for helping us improving greatly the manuscript.

**Reviewer #4 (Remarks to the Author):**

**The authors have adequately addressed my concerns.**

We thank the reviewer for helping us improving greatly the manuscript.
